# Supplementary material
Source: Elsevier journal article supplement (https://comptes-rendus.academie-sciences.fr/chimie/article/10.1016/j.crci.2012.11.004/file/attach/mmc1.pdf)
Supplement: mmc1 [file mmc1.pdf]

1  
2  
3  
4  
5  
6  
7  
8 Supporting information  
9  
10  
11  
12  
13  
14  
15  
16  
17  
18  
19  
20  
21  
22  
23  
24  
25  
26  
27  
28  
29  
30  
31  
32  
33  
34  
35  
36  
37  
38  
39  
40  
41  
42  
43  
44  
45  
46  
47  
48  
49  
50  
51  
52  
53  
54  
55  
56  
57  
58  
59  
60  
61  
62  
63  
64  
65

S1: SEM top view image of  $\text{TiO}_2$ -*nt* grown in 1 M  $\text{H}_3\text{PO}_4$  + 1 M NaOH + 0.5% HF at 50 V for 2h.
